# Supplementary material
Source: publisher site journal article supplement (https://www.dovepress.com/article/395231)

**Supplementary Material**

# Supplemental Figure

**Supplemental Figure 1** Dynamic changes of inflammatory indexes in 41 LA-ESCC patients reached pCR at baseline, after 2 cycles of nICT and postoperative one month. ns showed no statistical difference; * *P*<0.05, ** *P*<0.01, *** *P*<0.001.


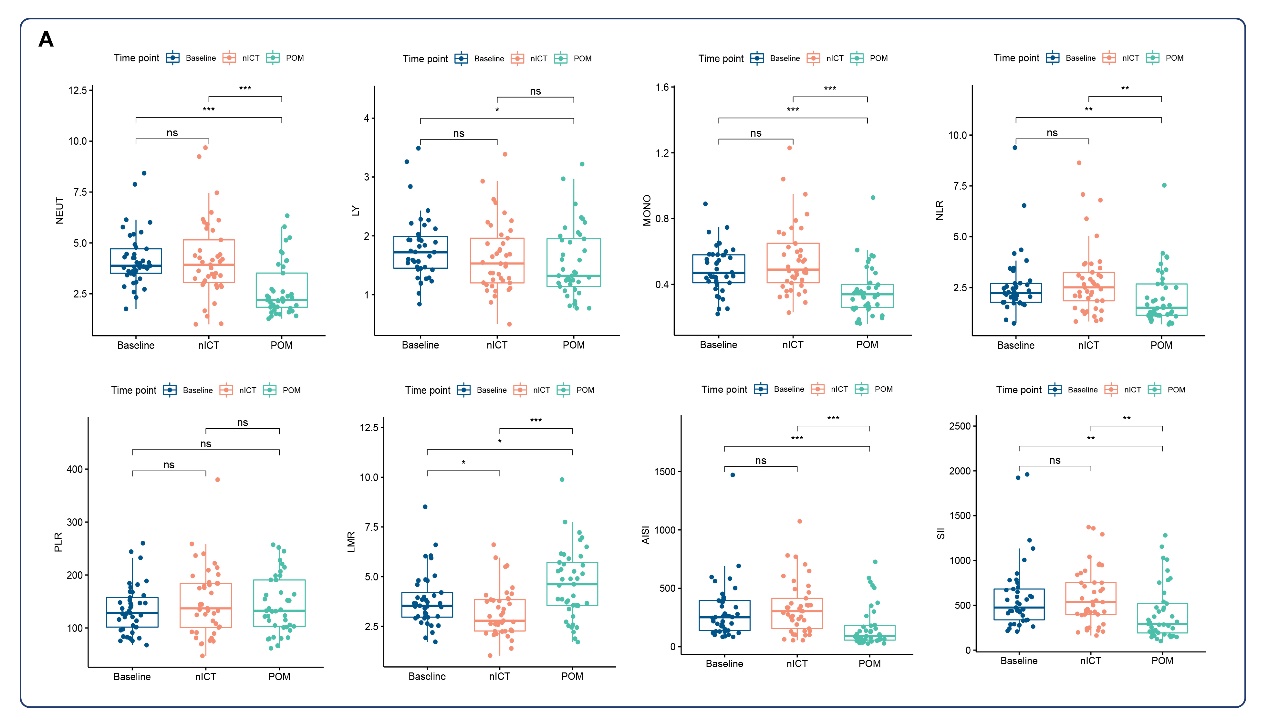

Supplement: Supplementary file 1 [file get_supplementary_file.php]
